# Supplementary material
Source: PubMed Central journal article supplement (PMC3630901)
Supplement: supp_M112.441816_jbc.M112.441816-1.pdf [file supp_M112.441816_jbc.M112.441816-1.pdf]

**Table I**

List of gene array components

**Table II**

Wound healing associated gene expression in the presence of TSA.

## Table I. List of gene array components

### Human Wound Healing Specific Genes:

#### **Extracellular Matrix & Cell Adhesion:**

ECM Components: COL14A1, COL1A1, COL1A2, COL3A1, COL4A1, COL4A3, COL5A1, COL5A2, COL5A3, VTN.

Remodeling Enzymes: CTSG, CTSK, CTSL2, F13A1, F3 (Tissue Factor), FGA (Fibrinogen), MMP1, MMP2, MMP7, MMP9, PLAT (tPA), PLAU (uPA), PLAUR (uPAR), PLG, SERPINE1 (PAI-1), TIMP1.

Cellular Adhesion: CDH1 (E-cadherin), ITGA1, ITGA2, ITGA3, ITGA4, ITGA5, ITGA6, ITGAV, ITGB1, ITGB3, ITGB5, ITGB6.

Cytoskeleton: ACTA2 ( $\alpha$ -SMA), ACTC1, RAC1, RHOA, TAGLN.

**Inflammatory Cytokines & Chemokines:** CCL2 (MCP-1), CCL7 (MCP-3), CD40LG (TNFSF5), CXCL1, CXCL11 (ITAC/IP-9), CXCL2, CXCL5 (ENA-78/LIX), IFNG, IL10, IL1B, IL2, IL4, IL6.

**Growth Factors:** ANGPT1, CSF2 (GM-CSF), CSF3 (GCSF), CTGF, EGF, FGF10, FGF2, FGF7, HBEGF (DTR), HGF, IGF1, MIF, PDGFA, TGFA, TGFB1, TNF, VEGFA.

#### **Signal Transduction:**

TGF $\beta$ : TGFB1, TGFBR3, STAT3.

WNT: CTNNB1, WISP1, WNT5A.

Phosphorylation: MAPK1 (ERK2), MAPK3 (ERK1), PTEN.

Receptors: EGFR, IL6ST (GP130).

Other: PTGS2.

**Table II. Wound healing associated gene expression in the presence of TSA.**

| <b>Gene</b>   | <b>Fold increase</b> | <b>SD</b>   |
|---------------|----------------------|-------------|
| <b>EGF</b>    | <b>5,70</b>          | <b>0,03</b> |
| <b>ITGB3</b>  | <b>3,23</b>          | <b>0,21</b> |
| <b>F3</b>     | <b>3,18</b>          | <b>0,07</b> |
| <b>FGF10</b>  | <b>2,72</b>          | <b>0,03</b> |
| <b>COL3A1</b> | <b>2,29</b>          | <b>0,13</b> |
| <b>IGF1</b>   | <b>2,16</b>          | <b>0,03</b> |
| <b>TAGLN</b>  | <b>2,16</b>          | <b>0,08</b> |
| <b>COL4A1</b> | <b>2,10</b>          | <b>0,29</b> |
| <b>FGF2</b>   | <b>2,00</b>          | <b>0,09</b> |
